# Supplementary material for: How Can We Best Measure Frailty in Cardiosurgical Patients?
Source: MDPI journal article supplement (doi:10.3390/jcm12083010), 2023-04-20
Supplement: s1 [file s1]

**Table S1:** Comorbidities and Type of Surgery in 3 groups according to fried.

| Comorbidities          | All (246)    | Frail (16)   | Prefrail (130) | Control (100) | p frail vs. prefrail | p frail vs. control | p prefrail vs. control |
|------------------------|--------------|--------------|----------------|---------------|----------------------|---------------------|------------------------|
| Age (years)            | 66.5+/-9.05  | 67.12+/-7.61 | 66.62+/-9.54   | 66.23+/-8.67  | 1                    | 1                   | 1                      |
| Sex (female)           | 21.14% (52)  | 43.75% (7)   | 23.08% (30)    | 15% (15)      | 0.273                | 0.052               | 0.273                  |
| Hypertension           | 72.36% (178) | 81.25% (13)  | 70.77% (92)    | 73% (73)      | 1                    | 1                   | 1                      |
| Diabetes               | 30.49% (75)  | 31.25% (5)   | 35.38% (46)    | 24% (24)      | 0.259                | 1                   | 1                      |
| LVEF                   | 56.86+/-8.3  | 58.12+/-4.9  | 56.45+/-9.31   | 57.18+/-7.29  | 1                    | 1                   | 1                      |
| Euroscore II           | 2.59+/-3.28  | 5.71+/-8.41  | 2.6+/-2.84     | 2.08+/-1.91   | 0.223                | <0.001              | <0.001                 |
| BMI (kg/m2)            | 29.71+/-5.21 | 31.44+/-6.79 | 29.77+/-5.41   | 29.37+/-4.64  | 0.564                | 0.419               | 0.451                  |
| Surgery                |              |              |                |               | 0.281                | 0.03                | 0.281                  |
| CABG                   | 40.24% (99)  | 25% (4)      | 37.69% (49)    | 46% (46)      |                      |                     |                        |
| sAVR                   | 32.11% (79)  | 31.25% (5)   | 31.54% (41)    | 33% (33)      |                      |                     |                        |
| Combination CAGB/sAVR  | 13.41% (33)  | 6.25% (1)    | 13.85% (18)    | 14% (14)      |                      |                     |                        |
| Other Operation        | 14.23% (35)  | 37.5% (6)    | 16.92% (22)    | 7% (7)        |                      |                     |                        |
| Complications          |              |              |                |               |                      |                     |                        |
| In hospital mortality  | 4.88% (12)   | 6.25% (1)    | 4.62% (6)      | 5% (5)        | 1                    | 1                   | 1                      |
| 1-year-mortality       | 8.22% (18)   | 26.67% (4)   | 7.02% (8)      | 6.67% (6)     | 1                    | 0.14                | 0.14                   |
| Wound healing disorder | 11.48% (28)  | 13.33% (2)   | 11.63% (15)    | 11% (11)      | 1                    | 1                   | 1                      |
| Stroke during stay     | 3.28% (8)    | 0% (0)       | 3.88% (5)      | 3% (3)        | 1                    | 1                   | 1                      |
| Arrythmias             | 25.61% (63)  | 26.67% (4)   | 26.36% (34)    | 25% (25)      | 1                    | 1                   | 1                      |
| Re-Thoracotomy         | 5.69% (14)   | 6.67% (1)    | 5.47% (7)      | 6% (6)        | 1                    | 1                   | 1                      |
| Myocardial infarction  | 0.82% (2)    | 6.67% (1)    | 0% (0)         | 1% (1)        | 1                    | 1                   | 0.58                   |
| Pneumonia              | 5.33% (13)   | 13.33% (2)   | 3.88% (5)      | 6% (6)        | 1                    | 1                   | 0.985                  |
| Delirium               | 10.25% (25)  | 13.33% (2)   | 11.63% (15)    | 8% (8)        | 1                    | 1                   | 1                      |
